# Supplementary material for: Aluminum molecular rings bearing amino-polyalcohol for iodine capture
Source: Royal Society of Chemistry journal article supplement (doi:10.1039/d1qi01451j), 2021-12-24
Supplement: d1qi01451j1.pdf [file d1qi01451j1.pdf]

# Aluminum Molecular Rings bearing Amino-polyalcohol for Iodine Capture

Yi Zhang,<sup>#</sup> Qiao-Hong Li,<sup>#</sup> Wei-Hui Fang\* and Jian Zhang

State Key Laboratory of Structural Chemistry, Fujian Institute of Research on the Structure of Matter, Chinese Academy of Sciences, Fuzhou, Fujian 350002, P. R. China.

Email: [fwh@fjirsm.ac.cn](mailto:fwh@fjirsm.ac.cn)

## CONTENT

|                                                                           |     |
|---------------------------------------------------------------------------|-----|
| Experimental Section .....                                                | S2  |
| PXRD analyses for molecular rings.....                                    | S8  |
| FT-IR spectra of molecular rings. ....                                    | S9  |
| EDS spectra of molecular rings. ....                                      | S11 |
| TGA spectra of molecular rings.....                                       | S12 |
| Iodine/Cyclohexane Adsorption Measurement. ....                           | S12 |
| DFT calculations. ....                                                    | S20 |
| Optimized geometries of the AIOCs interacting with iodine molecules. .... | S21 |
| Reference .....                                                           | S25 |

## Experimental Section

All the reagents and solvents employed were purchased commercially and used as received without further treatment. Aluminium isopropoxide, diisopropanolamine, 1,4-Butanediol were acquired from Aladdin Chemical Reagent Shanghai. Diethanolamine, phenol, methanol, and N, N-dimethylformamide (DMF) were acquired from Sinopharm Chemical Reagent Beijing. The Fourier transform infrared spectroscopy (FT-IR) data (KBr pellets) was recorded on a PerkinElmer Spectrum 100 FT-IR spectrometer over a range 400-4000  $\text{cm}^{-1}$ . The energy dispersive spectroscopy (EDS) analyses of single crystals were performed on a JEOL JSM6700F field-emission scanning electron microscope equipped with an Oxford INCA system. The EDS mapping of single crystals after iodine adsorption were performed on a Zeiss Sigma 300 field-emission scanning electron microscope equipped with an OXFORD AZtecOne X-Max<sup>N</sup> 20 silicon drift detector. Powder X-ray diffraction (PXRD) data were collected on a Rigaku Mini Flex II diffractometer using CuK radiation ( $\lambda = 1.54056 \text{ \AA}$ ) under ambient conditions. The thermogravimetric analyses (TGA) were performed on a Mettler Toledo TGA/SDTA 851e analyzer in a nitrogen atmosphere with a heating rate of 10  $^{\circ}\text{C}/\text{min}$ . The confocal Raman spectra were recorded on Horiba Jobin Yvon Labram HR Evolution Raman spectrometer at 785nm.

### Synthesis of AIOC-61.

A mixture of aluminium isopropoxide (500 mg, 2.45 mmol), diethanolamine (2 mL, 20.8 mmol), 1,4-Butanediol (2 mL) was sealed in a 20 mL vial and transferred to a preheated oven at 100  $^{\circ}\text{C}$  for 3 days. When cooled to room temperature, colourless crystals were obtained. (yield: 21 % based on  $\text{Al}(\text{O}^i\text{Pr})_3$ ). The crystals are rinsed with DMF and preserved under a sealed and dry environment. FT-IR (KBr,  $\text{cm}^{-1}$ ): 3110(v), 2920(s), 2858(s), 2695(m), 1506(w), 1443(m), 1274(s), 1075(s), 825(m).

### Synthesis of AIOC-62.

A mixture of aluminium isopropoxide (500 mg, 2.45 mmol), diisopropanolamine (1mL, 7.5 mmol), methanol (2 mL) and DMF (2 mL) was sealed in a 20 mL vial and transferred to a preheated oven at 80  $^{\circ}\text{C}$  for 3 days. When cooled to room temperature, colourless crystals were obtained. (yield: 38 % based on  $\text{Al}(\text{O}^i\text{Pr})_3$ ). The crystals are rinsed with ethanol and preserved in a sealed and dry environment. FT-IR (KBr,  $\text{cm}^{-1}$ ): 3118(v), 2914(s), 2853(s), 1510(s), 1456(m), 1360(s), 1284(s), 1150(s), 831(m).

### Synthesis of AIOC-63.

A mixture of aluminium isopropoxide (500 mg, 2.45 mmol), diethanolamine (2 mL, 20.8 mmol), phenol (2 mL), 1,4-Butanediol (2 mL) was sealed in a 20 mL vial and transferred to a preheated oven at 100  $^{\circ}\text{C}$  for 3 days. When cooled to room temperature, colourless crystals were obtained. (yield: 42 % based on  $\text{Al}(\text{O}^i\text{Pr})_3$ ). The crystals are rinsed with ethanol and preserved in a sealed and dry environment. The crystals are rinsed with IPA and preserved under a sealed and dry environment. FT-IR (KBr,  $\text{cm}^{-1}$ ): 3480(v), 3110(v), 2920(s), 2852(s), 2695(v), 1655(v), 1506(w), 1450(m), 1365(s), 1271(s), 1131(s), 828(m).

### Synthesis of AIOC-64.

A mixture of aluminium isopropoxide (500 mg, 2.45 mmol), diethanolamine (2 mL, 20.8 mmol), 1,4-Butanediol (2 mL) was sealed in a 20 mL vial and transferred to a preheated oven at 100  $^{\circ}\text{C}$  for 3 days. The obtained system was continued to react at room temperature for 8 days, it was observed that the colourless crystals changed from needle to block. Obtained AIOC-64. The crystals are rinsed with DMF and preserved under a sealed and dry environment. FT-IR (KBr,  $\text{cm}^{-1}$ ): 3258(v), 2920(s), 2855(s), 2695(v),

1660(v), 1506(w), 1450(m), 1360(s), 1120(s), 825(m).

### X-ray Crystallographic Analyses.

Crystallographic data of crystal **AIOC-61**, **AIOC-62**, **AIOC-63**, and **AIOC-64** were collected on Hybrid Pixel Array detector equipped with Ga-K $\alpha$  radiation ( $\lambda = 1.3405 \text{ \AA}$ ) at 100 K. The structures were solved with the dual-direct methods using ShelXT and refined with the full-matrix least-squares technique based on  $F^2$  using the SHELXL-2014. Non-hydrogen atoms were refined anisotropically. Hydrogen atoms were added theoretically, riding on the concerned atoms and refined with fixed thermal factors. All absorption corrections were performed using the multiscan program. The diffused electron densities resulting from residual solvent molecules were removed from the data set using the *SQUEEZE* routine of *PLATON* and refined further using the data generated. The obtained crystallographic data are summarized in Table S1.

**Table S1** Summary of aluminum molecular rings: crystal data and structure refinement results

| Compound                                                                                             | AIOC-61                                                                           | AIOC-62                                                                         | AIOC-63                                                                        | AIOC-64                                                                         |
|------------------------------------------------------------------------------------------------------|-----------------------------------------------------------------------------------|---------------------------------------------------------------------------------|--------------------------------------------------------------------------------|---------------------------------------------------------------------------------|
| Formula                                                                                              | C <sub>48</sub> H <sub>120</sub> Al <sub>12</sub> N <sub>12</sub> O <sub>36</sub> | C <sub>56</sub> H <sub>104</sub> Al <sub>8</sub> N <sub>8</sub> O <sub>24</sub> | C <sub>48</sub> H <sub>84</sub> Al <sub>6</sub> N <sub>6</sub> O <sub>22</sub> | C <sub>40</sub> H <sub>100</sub> Al <sub>6</sub> N <sub>6</sub> O <sub>26</sub> |
| <i>Mr</i>                                                                                            | 1765.31                                                                           | 1489.31                                                                         | 1259.09                                                                        | 1243.13                                                                         |
| Temperature(K)                                                                                       | 100 K                                                                             | 100 K                                                                           | 100 K                                                                          | 100 K                                                                           |
| Wavelength (Å)                                                                                       | 1.34050                                                                           | 1.34050                                                                         | 1.34050                                                                        | 1.34050                                                                         |
| Crystal system                                                                                       | trigonal                                                                          | triclinic                                                                       | trigonal                                                                       | triclinic                                                                       |
| Space group                                                                                          | <i>P</i> -3                                                                       | <i>P</i> -1                                                                     | <i>P</i> -3                                                                    | <i>P</i> -1                                                                     |
| <i>a</i> /Å                                                                                          | 28.6072(7)                                                                        | 17.3306(2)                                                                      | 22.4999(6)                                                                     | 12.3873(4)                                                                      |
| <i>b</i> /Å                                                                                          | 28.6072(7)                                                                        | 17.6352(3)                                                                      | 22.4999(6)                                                                     | 12.7993(4)                                                                      |
| <i>c</i> /Å                                                                                          | 10.6348(3)                                                                        | 27.9553(4)                                                                      | 12.7820(3)                                                                     | 12.8165(4)                                                                      |
| $\alpha$ /°                                                                                          | 90                                                                                | 85.3990(10)                                                                     | 90                                                                             | 66.719(3)                                                                       |
| $\beta$ /°                                                                                           | 90                                                                                | 75.2440(10)                                                                     | 90                                                                             | 72.747(3)                                                                       |
| $\gamma$ /°                                                                                          | 120                                                                               | 80.3140(10)                                                                     | 120                                                                            | 70.308(3)                                                                       |
| <i>V</i> /Å <sup>3</sup>                                                                             | 7537.2(4)                                                                         | 8138.1(2)                                                                       | 5603.9(3)                                                                      | 1725.77(11)                                                                     |
| <i>Z</i>                                                                                             | 3                                                                                 | 4                                                                               | 3                                                                              | 1                                                                               |
| $\rho$ /g cm <sup>-3</sup>                                                                           | 1.167                                                                             | 1.216                                                                           | 1.119                                                                          | 1.196                                                                           |
| $\mu$ /mm <sup>-1</sup>                                                                              | 1.126                                                                             | 0.996                                                                           | 0.874                                                                          | 0.969                                                                           |
| <i>F</i> (000)                                                                                       | 2808.0                                                                            | 3168.0                                                                          | 2004.0                                                                         | 668.0                                                                           |
| Collected reflns                                                                                     | 33637                                                                             | 117233                                                                          | 21595                                                                          | 23055                                                                           |
| Uniq reflns ( <i>R</i> <sub>int</sub> )                                                              | 11324(0.0302)                                                                     | 36587(0.0567)                                                                   | 6574(0.0363)                                                                   | 7779(0.0285)                                                                    |
| Completeness                                                                                         | 0.973                                                                             | 0.972                                                                           | 0.994                                                                          | 0.976                                                                           |
| <i>GOF</i> on <i>F</i> <sup>2</sup>                                                                  | 1.070                                                                             | 1.126                                                                           | 1.270                                                                          | 1.058                                                                           |
| <i>R</i> <sub>1</sub> <sup>a</sup> / <i>wR</i> <sub>2</sub> <sup>b</sup> [ <i>I</i> > 2( <i>I</i> )] | 0.0862/0.2785                                                                     | 0.0752/0.2197                                                                   | 0.1139/0.3035                                                                  | 0.0647/0.1825                                                                   |
| CCDC number                                                                                          | 2117926                                                                           | 2117930                                                                         | 2117927                                                                        | 2117928                                                                         |

<sup>a</sup> $R_1 = \Sigma||F_o| - |F_c|| / \Sigma|F_o|$ . <sup>b</sup> $wR_2 = \{\Sigma[w(F_o^2 - F_c^2)^2] / \Sigma[w(F_o^2)^2]\}^{1/2}$ .

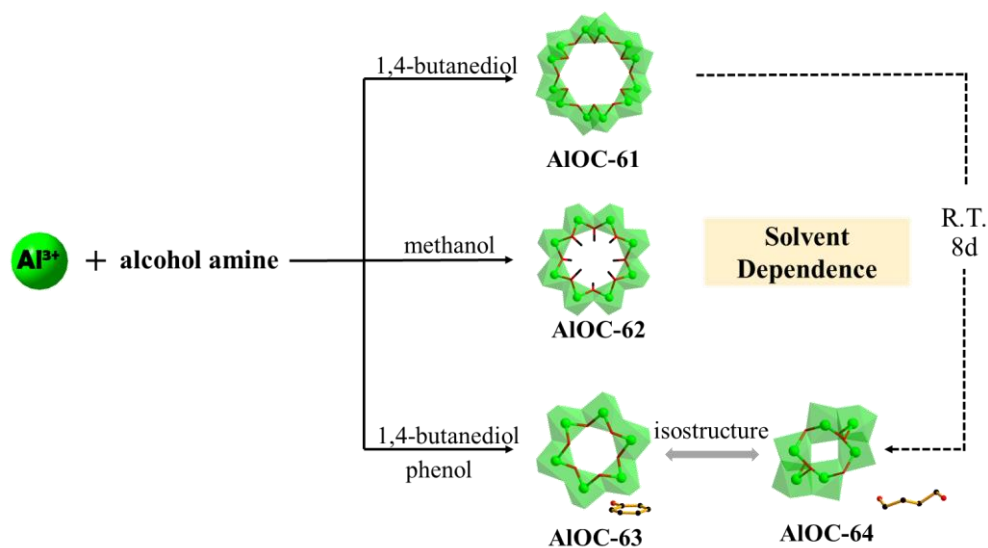

**Fig. S1** Diagram showing the solvent dependence synthesis of the aluminium molecular rings.

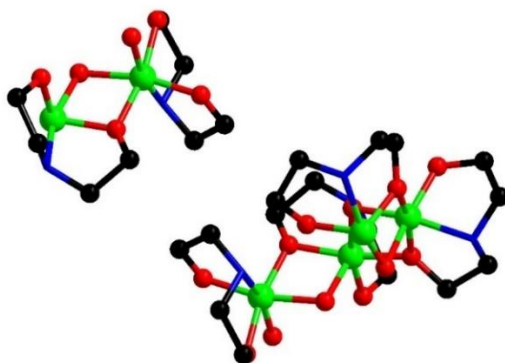

**Fig. S2** Two crystallographically independent moieties in the asymmetric unit of AlOC-61. Color code: Al, green; C, black; O, red; N, blue.

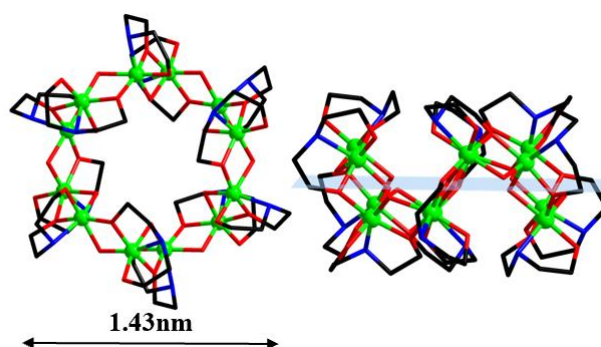

**Fig. S3** Top (left) and side (right) view of AlOC-61. Color code: Al, green; C, black; O, red; N, blue.

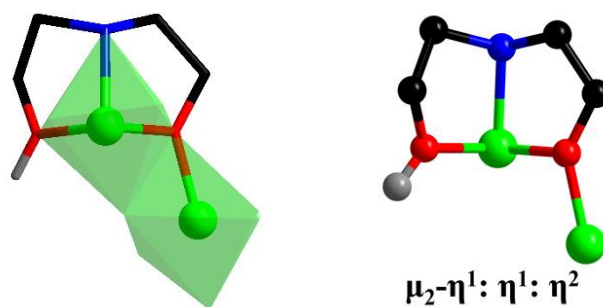

**Fig. S4** Coordination environment of  $\text{Al}^{\text{III}}$  ions in all Al rings: the  $\mu_2\text{-}\eta^1: \eta^1: \eta^2$  mode. Color code: Al, green; C, black; O, red; N, blue; H, gray.

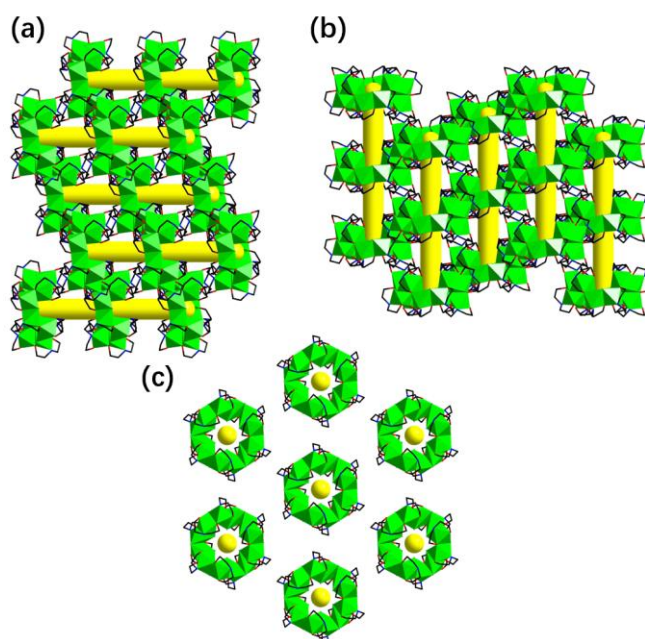

**Fig. S5** Stacking diagrams of **AlIOC-61** in the view of a-axis (a), b-axis (b) and c-axis (c).

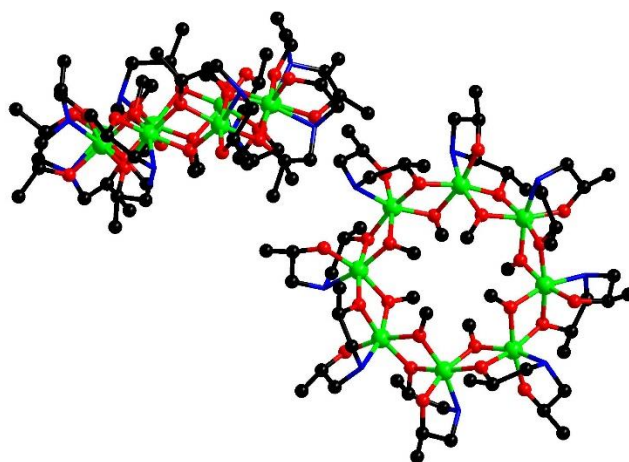

**Fig. S6** Two crystallographically independent moieties in the asymmetric unit of **AlIOC-62**. Color code: Al, green; C, black; O, red; N, blue.

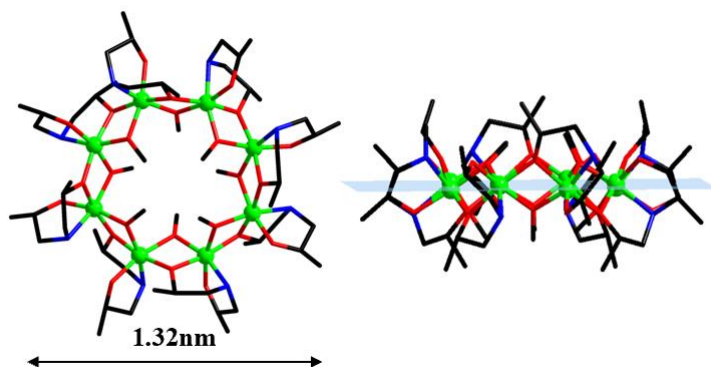

**Fig. S7** Top (left) and side (right) view of **AlIOC-62**. Color code: Al, green; C, black; O, red; N, blue.

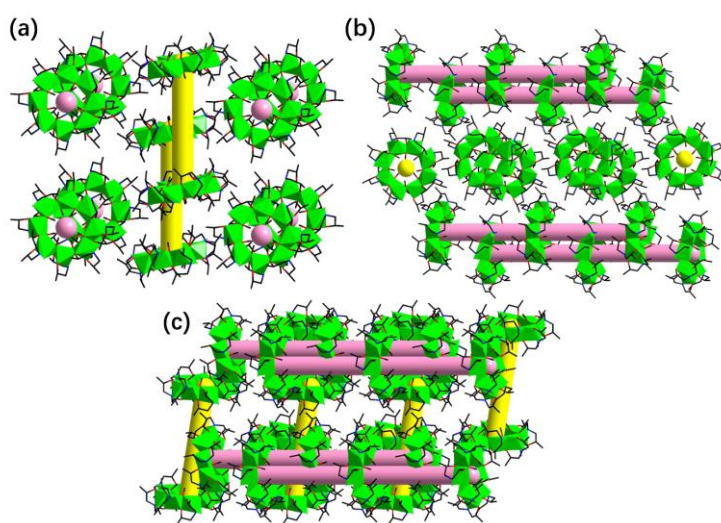

**Fig. S8** Stacking diagrams of **AlIOC-62** in the view of a-axis (a), b-axis (b) and c-axis (c).

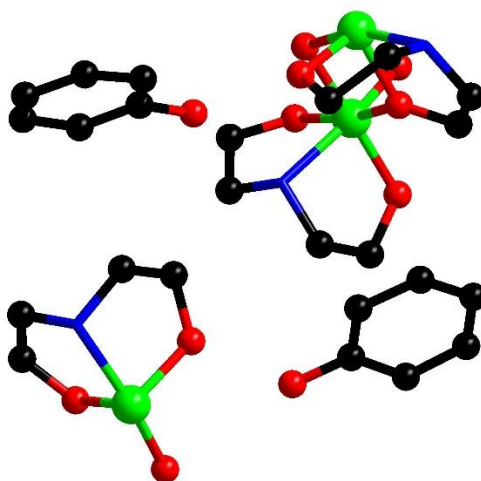

**Fig. S9** Crystallographically independent moieties in the asymmetric unit of **AlIOC-63**. Color code: Al, green; C, black; O, red; N, blue.

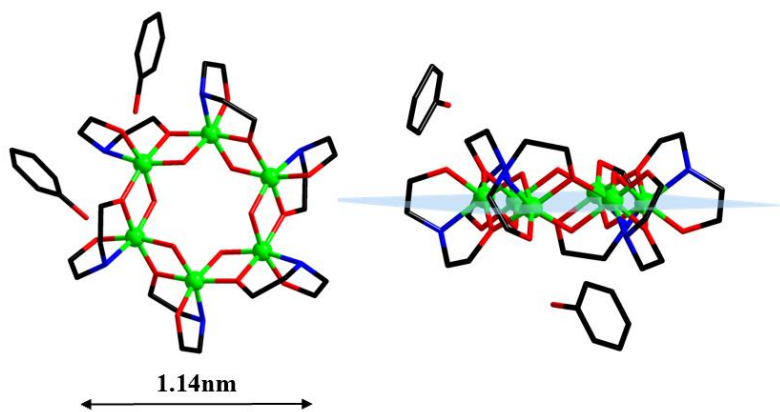

**Fig. S10** Top (left) and side (right) view of **AlIOC-63**. Color code: Al, green; C, black; O, red; N, blue.

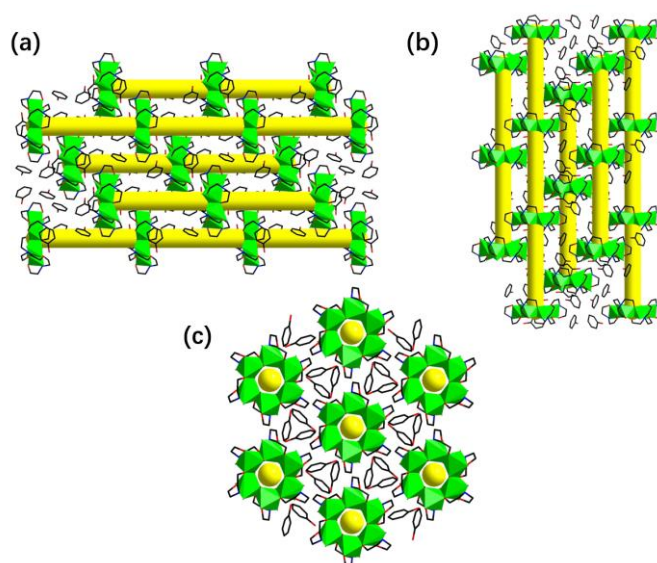

**Fig. S11** Stacking diagrams of **AlIOC-63** in the view of a-axis (a), b-axis (b) and c-axis (c).

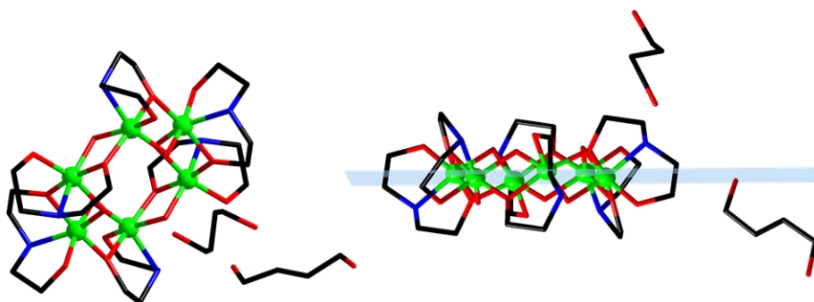

**Fig. S12** Top (left) and side (right) view of **AlIOC-64**. Color code: Al, green; C, black; O, red; N, blue.

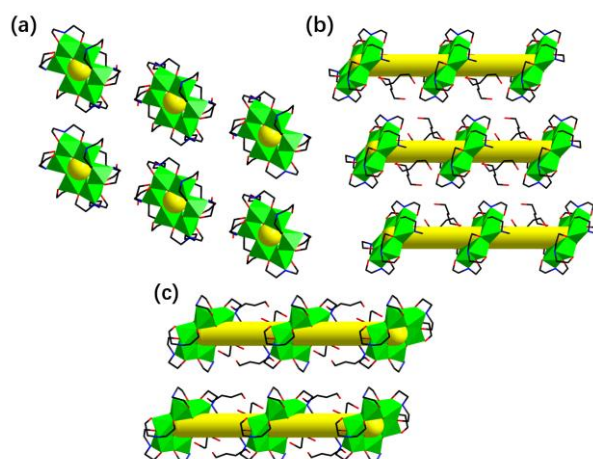

**Fig. S13** Stacking diagrams of **AlOC-64** in the view of a-axis (a), b-axis (b) and c-axis (c).

**PXRD analyses for molecular rings.**

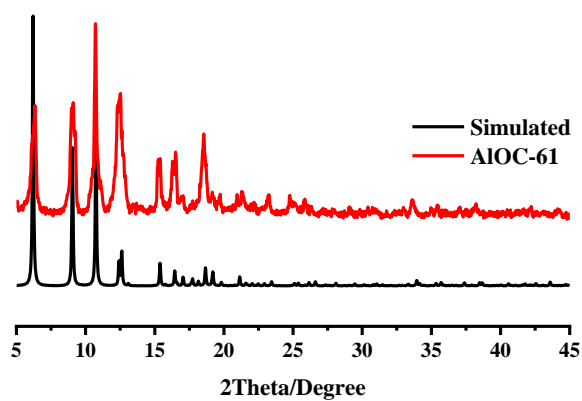

**Fig. S14** PXRD patterns of **AlOC-61**.

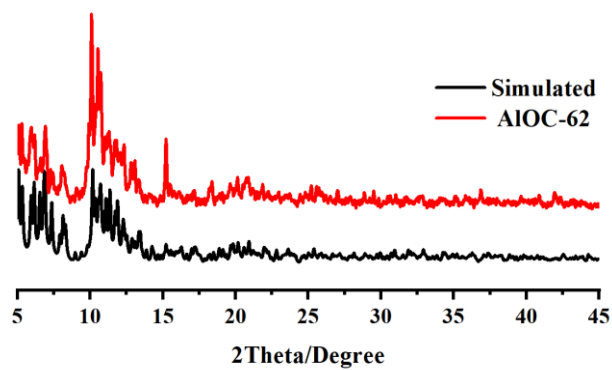

**Fig. S15** PXRD patterns of **AlOC-62**.

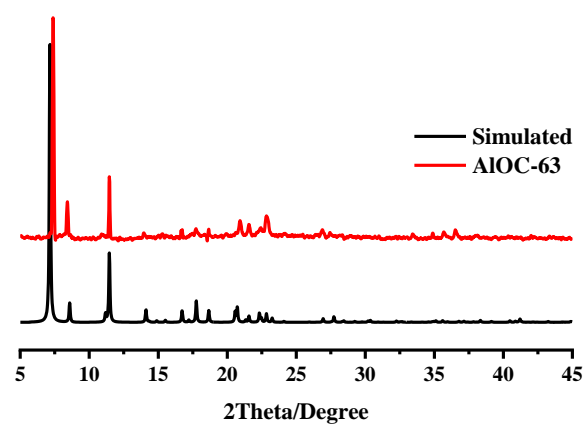

**Fig. S16** PXRD patterns of AlOC-63.

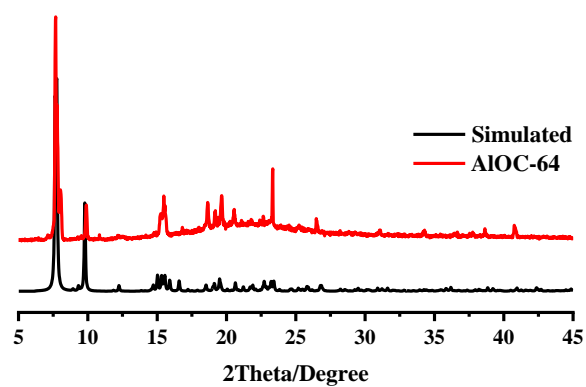

**Fig. S17** PXRD patterns of AlOC-64.

**FT-IR spectra of molecular rings.**

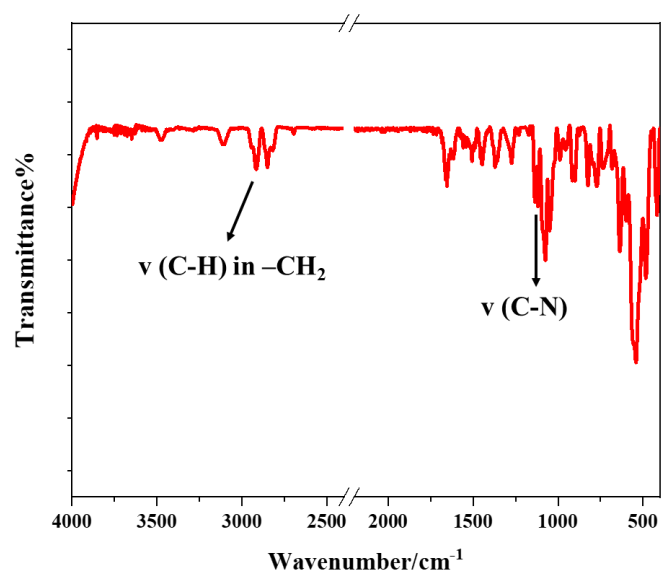

**Fig. S18** FT-IR spectra of AlOC-61.

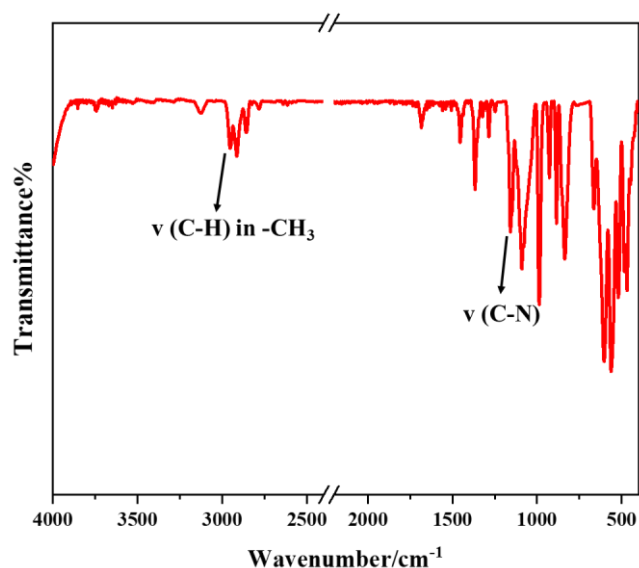

**Fig. S19** FT-IR spectra of AIOC-62.

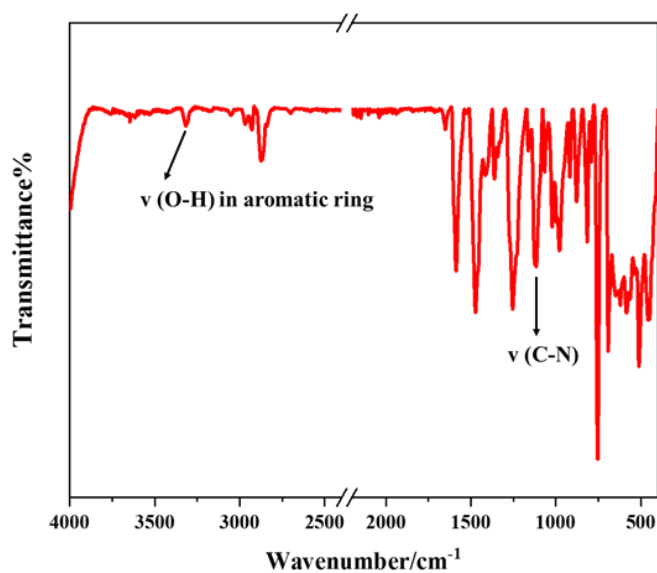

**Fig. S20** FT-IR spectra of AIOC-63.

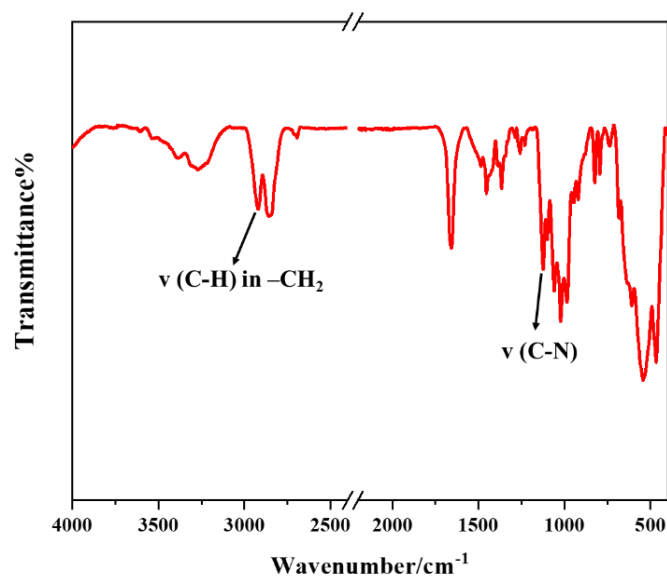

**Fig. S21** FT-IR spectra of AIOC-64.

## EDS spectra of molecular rings.

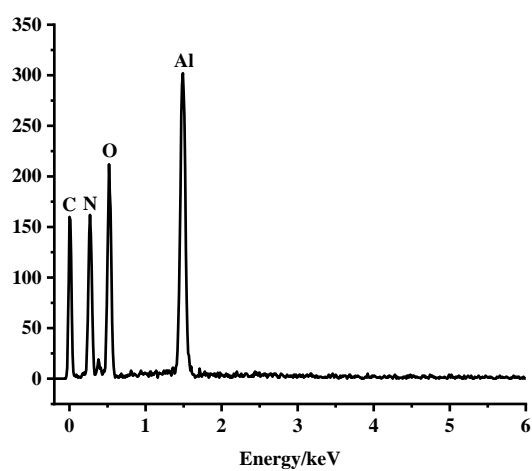

**Fig. S22** EDS spectra of AlOC-61.

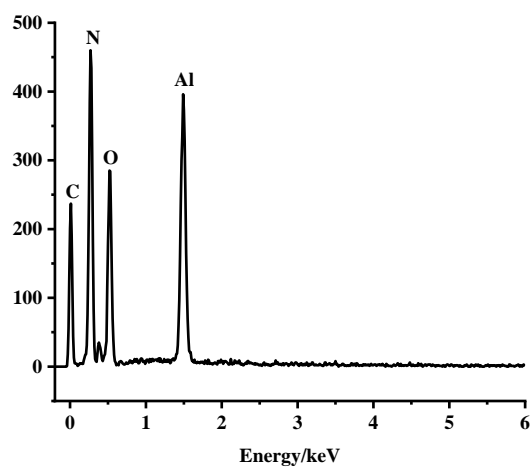

**Fig. S23** EDS spectra of AlOC-62.

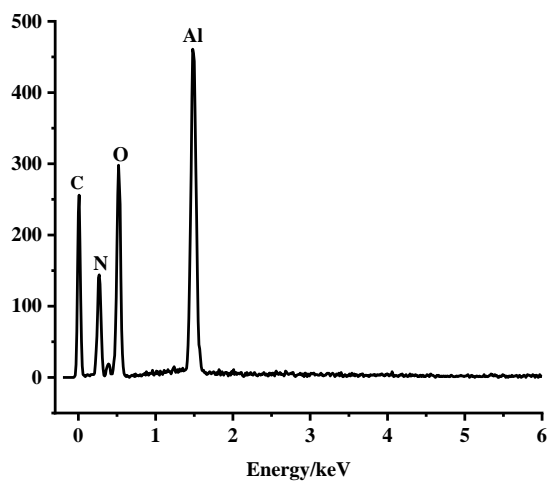

**Fig. S24** EDS spectra of AlOC-63.

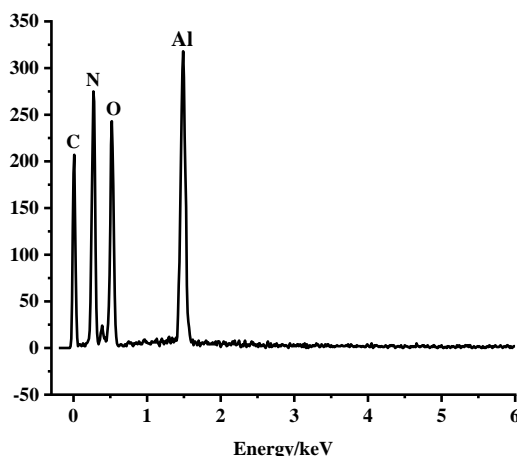

Fig. S25 EDS spectra of AlOC-64.

TGA spectra of molecular rings.

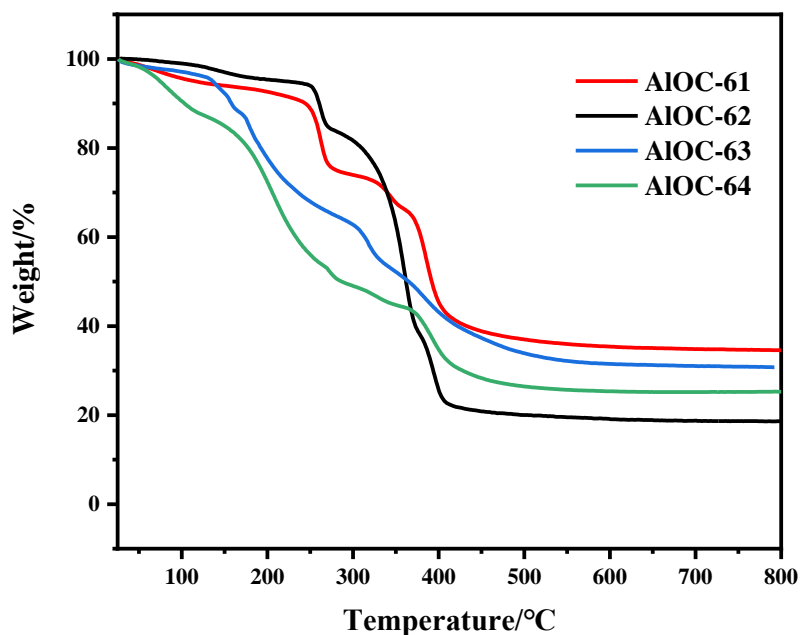

Fig. S26 TGA spectra of AlOC-61, AlOC-62, AlOC-63 and AlOC-64.

### Iodine/Cyclohexane Adsorption Measurement.

Adsorption studies were performed by immersing 10mg sample in 10 mL iodine/cyclohexane solution. The supernatant solution was used for each UV–vis absorbance measurement periodically. After each measurement, the solution was dispensed back into the respective vial to keep the volume constant. The absorbance at the maximum wavelength of iodine ( $\lambda_{\max} = 521\text{nm}$ ) was selected to calculate the iodine content, and the absorbance value of the original solution was standardized to 100%. The removal ratios of iodine were calculated using  $R = (C_0 - C_t)/C_0 \times 100\%$  (where  $C_0$  and  $C_t$  represent the initial concentration and concentration at time  $t$ , respectively).

Sorption kinetics of iodine in AlOC-61 and AlOC-63 were fitted to a pseudo-second-order kinetics model, respectively,  $t/q_t = 1/h + t/q_e$  (where  $q_t$ ,  $q_e$  represent the amounts of adsorbate at certain time  $t$  or at equilibrium time,  $h$  is the initial adsorption rate,  $h = kq_e^2$ , and  $k$  is the rate constant)

The Langmuir and Freundlich models were used to interpret the experimental data. The linear equation of the Langmuir isotherm model is expressed as followed:

$$\frac{C_e}{q_e} = \frac{1}{q_m k_L} + \frac{C_e}{q_m}$$

Where  $q_m$  is the maximum sorption capacity corresponding to complete monolayer coverage (mg/g) and  $k_L$  is a constant indirectly related to sorption capacity and energy of sorption (L/mg), which characterizes the affinity of the adsorbate with the adsorbent. The linearized plot was obtained when we plotted  $C_e/q_e$  against  $C_e$  and  $q_m$  and  $k_L$  could be calculated from the slope and intercept.

The linear equation of Freundlich isotherm model can be expressed by:

$$\ln q_e = \ln k_F + \frac{1}{n} \ln C_e$$

Where  $k_F$  and  $n$  are the Freundlich constants related to the sorption capacity and the sorption intensity, respectively. The linear plot was obtained by plotting  $\ln q_e$  against  $\ln C_e$ , and the values of  $k_F$  and  $n$  were calculated from the slope and intercept of the straight line.

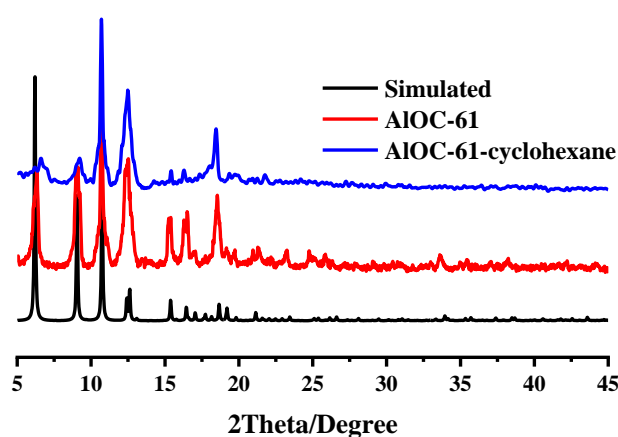

**Fig. S27** PXRD patterns of AlOC-61 in cyclohexane solution at room temperature for 24 h.

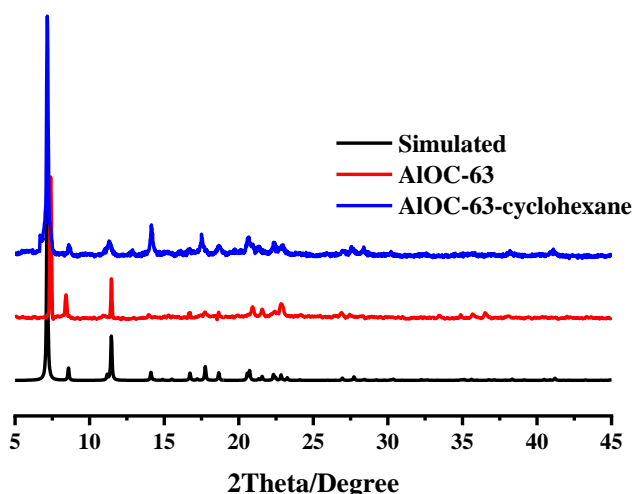

**Fig. S28** PXRD patterns of AlOC-63 in cyclohexane solution at room temperature for 24 h.

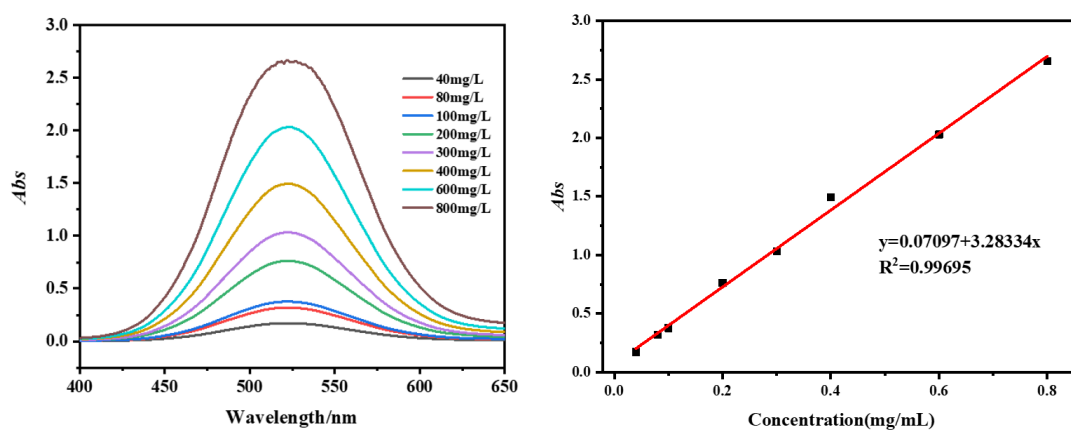

**Fig. S29** Calibration plots of standard iodine by UV-vis spectra in cyclohexane solution.

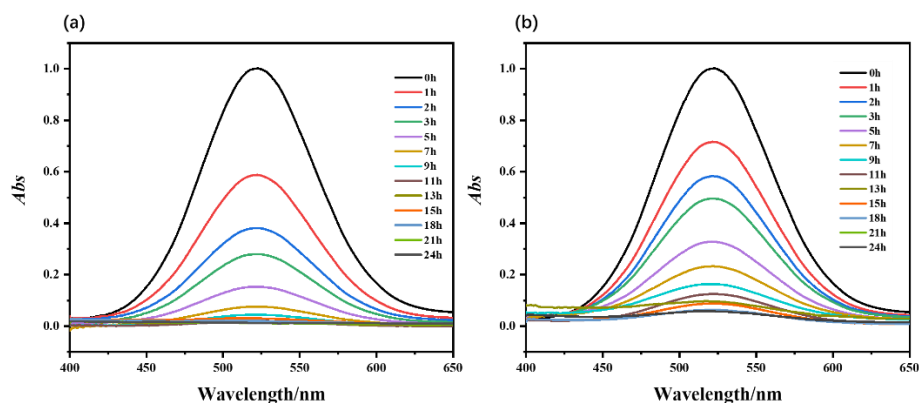

**Fig. S30** UV-vis spectra of AIOCs adsorbing iodine over time in a 1 mmol·L<sup>-1</sup> cyclohexane solution of iodine when 10 mg of AIOCs is added. (a) AIOc-61, (b) AIOc-63.

**Table S2** Kinetic parameters of the pseudo-second-order model for iodine adsorption toward AIOc-61, AIOc-63 (1 mmol/L)

| Sample  | Second-order kinetic model |                                              |                                              |         |
|---------|----------------------------|----------------------------------------------|----------------------------------------------|---------|
|         | $q_e$<br>(mg/g)            | $h$<br>(g mg <sup>-1</sup> h <sup>-1</sup> ) | $k$<br>(g mg <sup>-1</sup> h <sup>-1</sup> ) | $R^2$   |
| AIOc-61 | 241.117                    | 359.145                                      | $6.173 \times 10^{-3}$                       | 0.99909 |
| AIOc-63 | 251.948                    | 145.225                                      | $2.287 \times 10^{-3}$                       | 0.99765 |

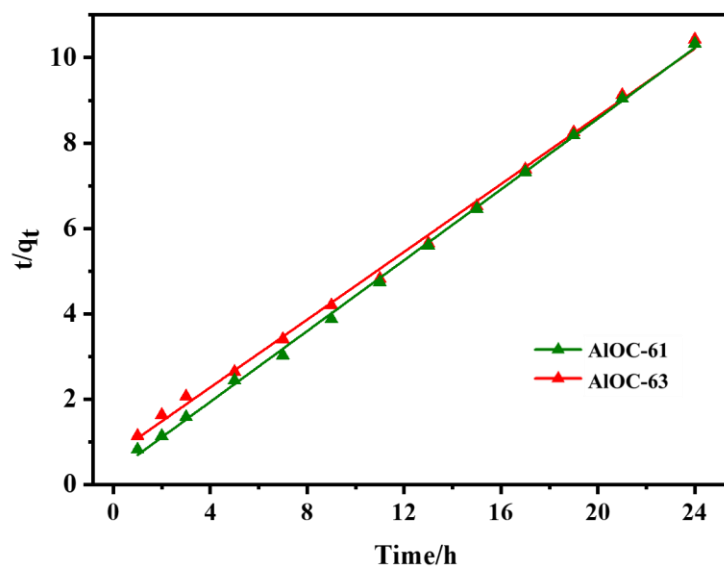

**Fig. S31** The corresponding plots of pseudo-second-order kinetics of I<sub>2</sub> adsorption onto **AIOC-61** (olive green) and **AIOC-63** (red).

**Table S3** Fitting results of the sorption isotherms according to the Langmuir equations and Freundlich equations

| Sample  | Langmuir                 |                          |                | Freundlich                                               |         |                |
|---------|--------------------------|--------------------------|----------------|----------------------------------------------------------|---------|----------------|
|         | Q <sub>m</sub><br>(mg/g) | K <sub>L</sub><br>(L/mg) | R <sup>2</sup> | k <sub>F</sub><br>(L <sup>n</sup> /mol <sup>n-1</sup> g) | n       | R <sup>2</sup> |
| AIOC-61 | 732.44445                | 0.09675                  | 0.98953        | 37.33766                                                 | 2.41156 | 0.74737        |
| AIOC-63 | 575.51794                | 0.33351                  | 0.99861        | 56.66853                                                 | 3.09831 | 0.82228        |

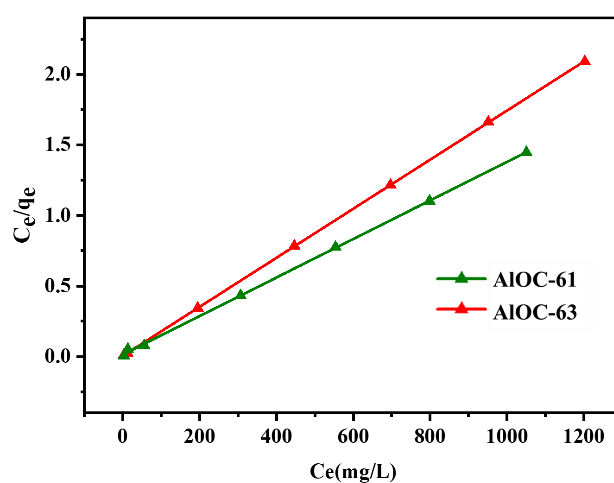

**Fig. S32** The corresponding plots of the Langmuir model of **AIOC-61**(olive green) and **AIOC-63** (red).

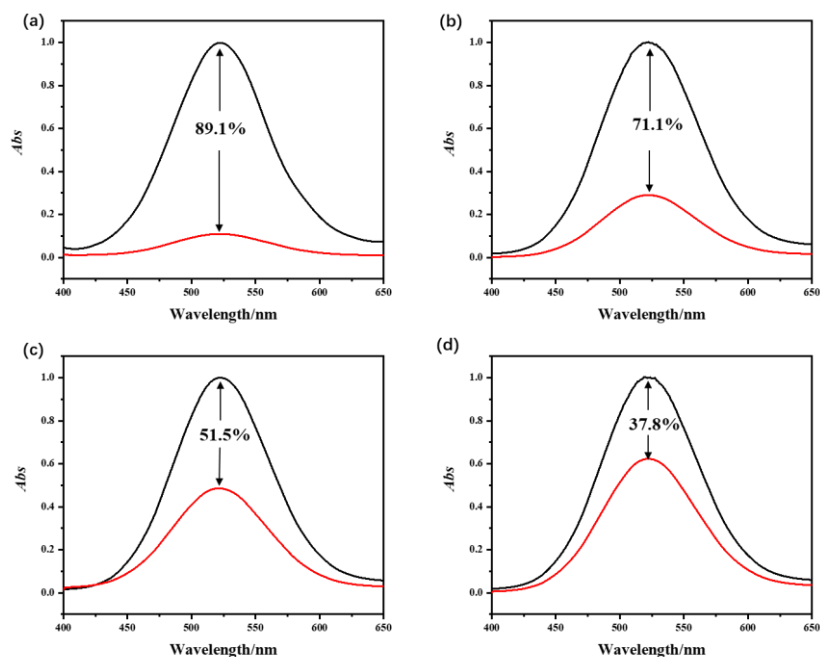

**Fig. S33** UV-vis spectra of **AIOC-61** (10 mg) adsorbing iodine for 24 h in different concentration cyclohexane solution of iodine: (a)  $3\text{mmol}\cdot\text{L}^{-1}$ ; (b)  $4\text{mmol}\cdot\text{L}^{-1}$ ; (c)  $5\text{mmol}\cdot\text{L}^{-1}$ ; (d)  $6\text{mmol}\cdot\text{L}^{-1}$ .

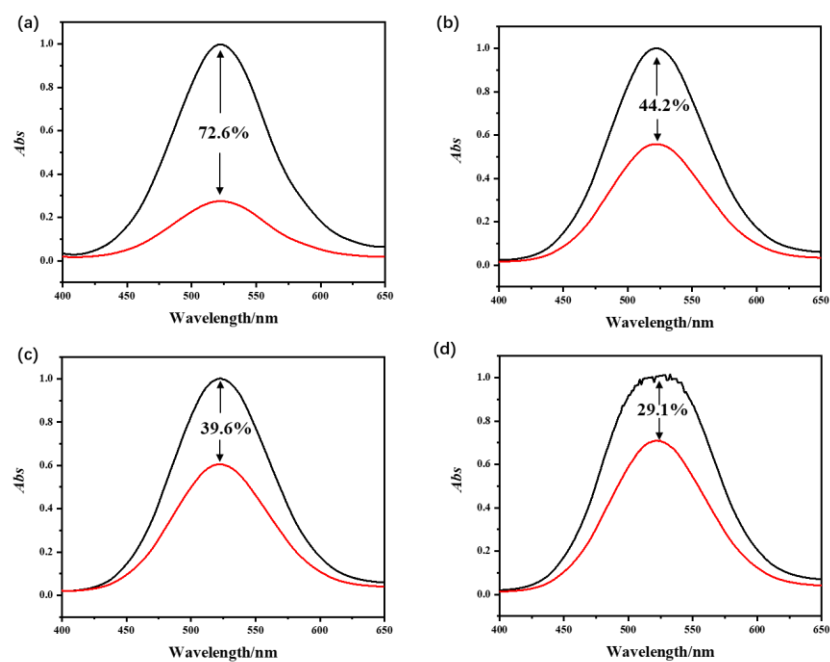

**Fig. S34** UV-vis spectra of **AIOC-63** (10 mg) adsorbing iodine for 24 h in different concentration cyclohexane solution of iodine: (a)  $3\text{mmol}\cdot\text{L}^{-1}$ ; (b)  $4\text{mmol}\cdot\text{L}^{-1}$ ; (c)  $5\text{mmol}\cdot\text{L}^{-1}$ ; (d)  $6\text{mmol}\cdot\text{L}^{-1}$ .

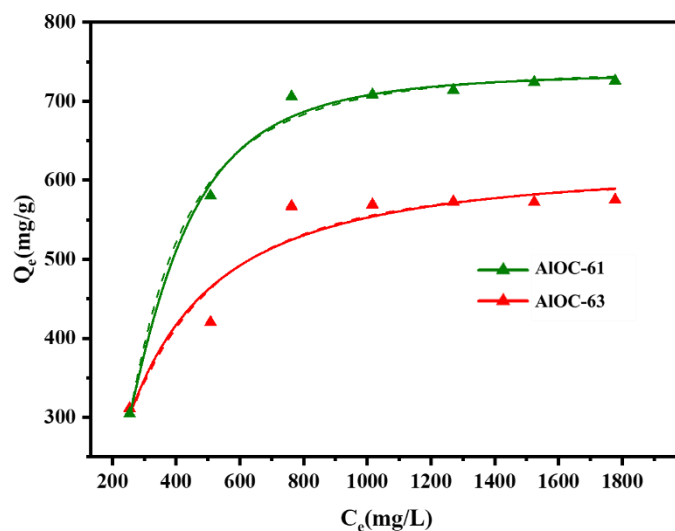

**Fig. S35** Adsorption isotherms for the uptake of  $I_2$  onto **AIOC-61** (olive green) and **AIOC-63** (red): Solid line, Langmuir fitting; dashed line, Freundlich fitting.

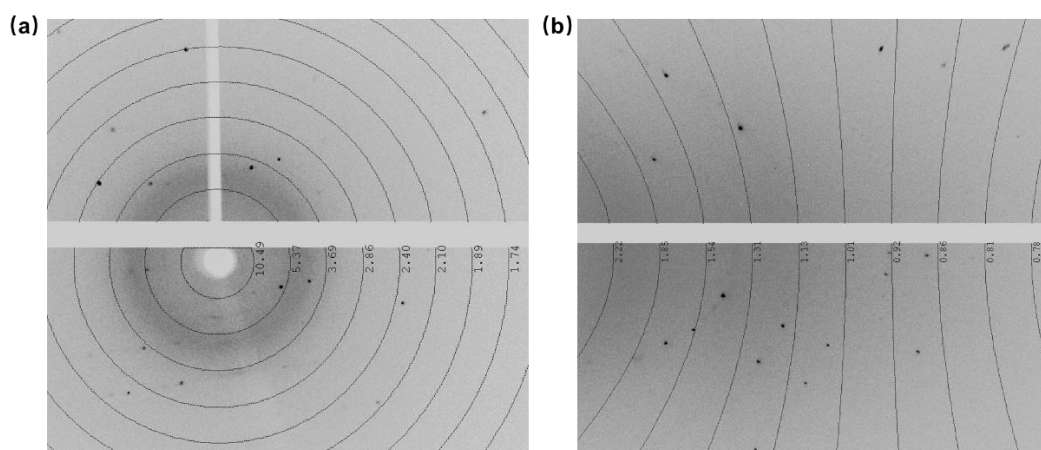

**Fig. S36** SXRD patterns for **AIOC-61** $\supset I_2$ .

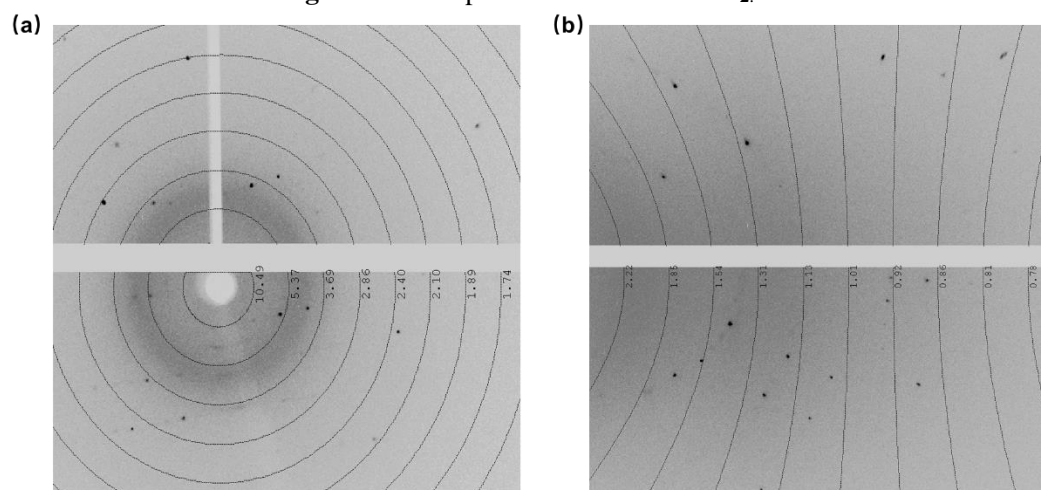

**Fig. S37** SXRD patterns for **AIOC-63** $\supset I_2$ .

The host-guest interaction between **AIOCs** and  $I_2$  didn't make the crystal diffraction poorly. The existence of a good diffraction image point at a low angle and high angle confirms the good quality of **AIOCs** on a single crystalline state after the iodine adsorption.

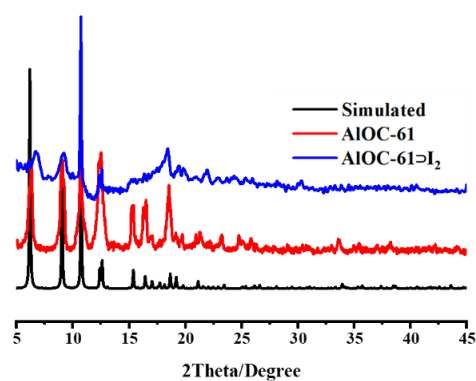

**Fig. S38** PXRD patterns of **AlOC-61** before and after iodine adsorption.

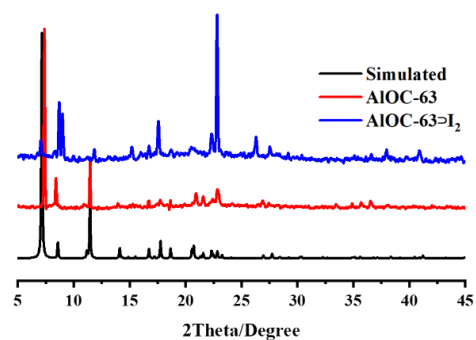

**Fig. S39** PXRD patterns of **AlOC-63** before and after iodine adsorption.

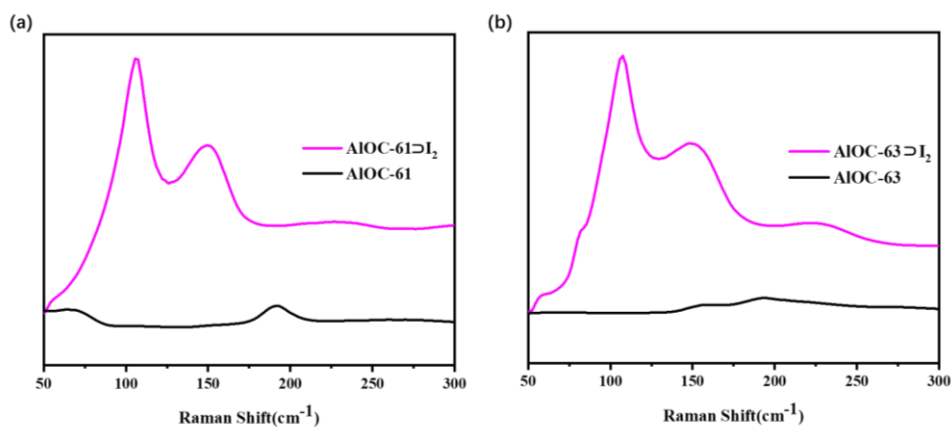

**Fig. S40** Comparison Raman spectra of bare samples and **AlOCs⊃I₂** in the low energy region. (**AlOCs⊃I₂** were obtained by soaking fresh samples in iodine/cyclohexane solutions (10 mL, 3mmol·L<sup>-1</sup> for 24 hours).

Raman spectra confirmed the existence of iodine species in **AlOC-61⊃I₂** and **AlOC-63⊃I₂**. The new peak appeared at ~106, 148 cm<sup>-1</sup> for **AlOC-61⊃I₂**. And the new peak appeared at ~107, 150 cm<sup>-1</sup> for **AlOC-63⊃I₂**.

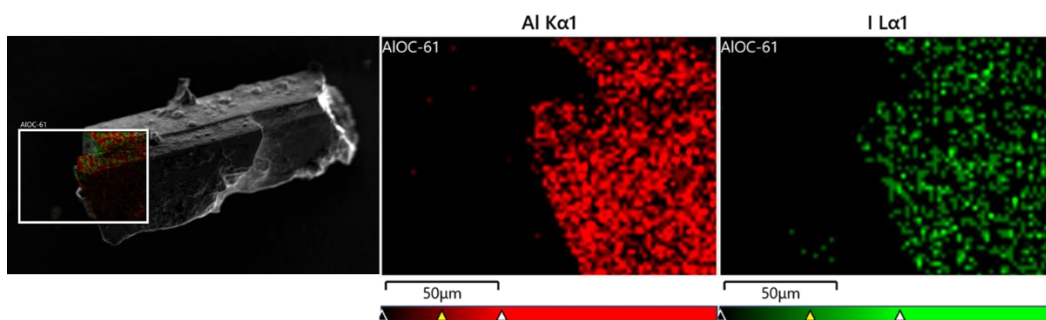

**Fig. S41** EDS-mapping spectra of AIOC-61 $\supset$ I<sub>2</sub>. From left to right are crystal appearance, aluminum, iodine elements.

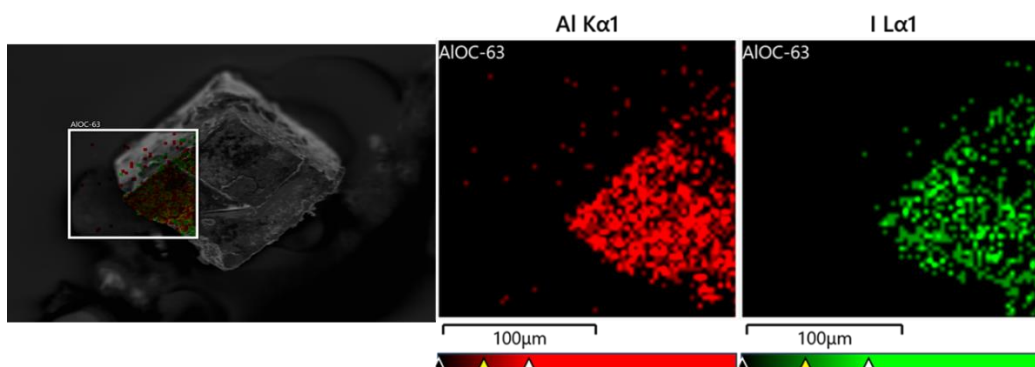

**Fig. S42** EDS-mapping spectra of AIOC-63 $\supset$ I<sub>2</sub>. From left to right are crystal appearance, aluminum, iodine elements.

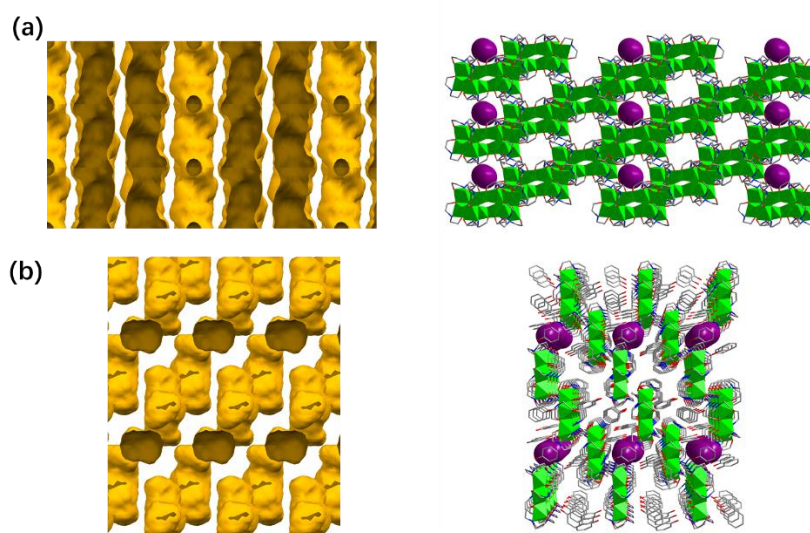

**Fig. S43** According to the calculation results, simulate the position of one iodine molecule in the free void, and can observe the I<sub>2</sub> molecules get into the pores ((a) AIOC-61 and (b) AIOC-63) by entering through the pocket.

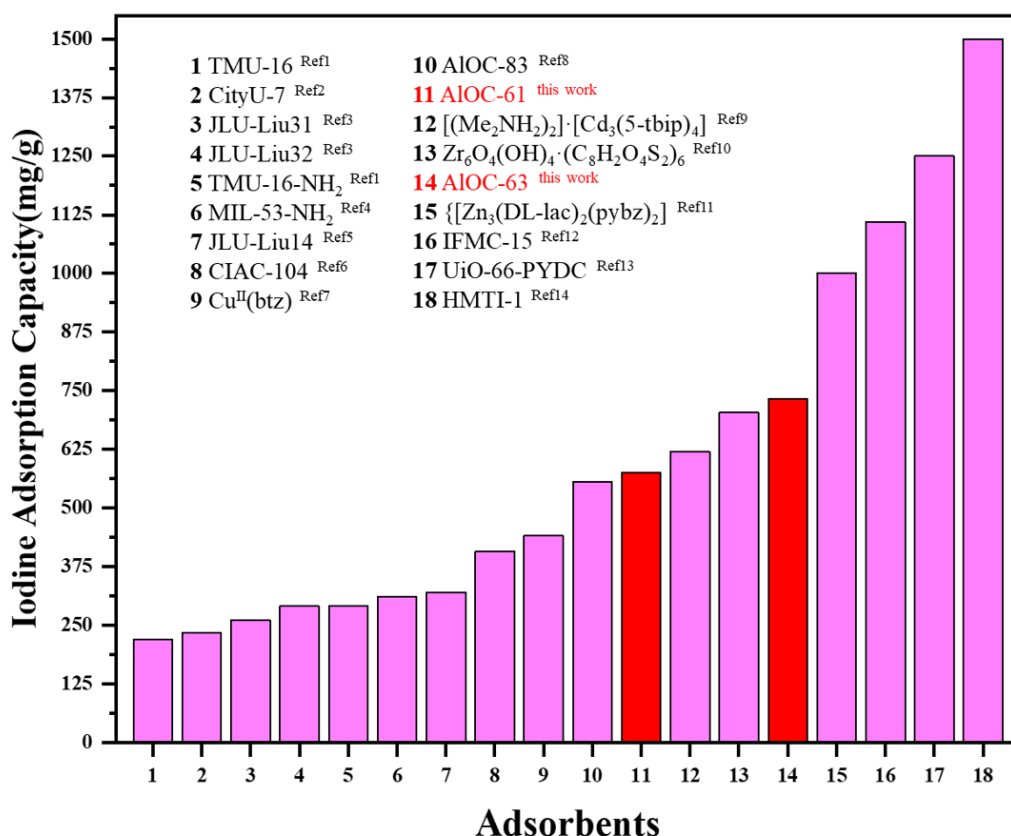

Fig. S44 Liquid phase iodine adsorption capacities of different adsorbents.<sup>[1-14]</sup>

### DFT calculations.

All density functional theory calculations were implemented by the Dmol3 package.<sup>[15, 16]</sup> All calculations were performed with PBE exchange-correlation functional (the 1996 functional of Perdew, Burke and Ernzerhof) on periodically repeated slabs.<sup>[17]</sup> The double-numeric quality basis set with polarization functions (DNP) was adopted.<sup>[16, 18, 19]</sup> The numerical basis sets can minimise the basis-set superposition error.<sup>[20]</sup> A Fermi smearing of 0.005 hartree was utilized was used for structural relaxation. The tolerances of the energy, gradient and displacement convergence were  $1 \times 10^{-5}$  hartree,  $2 \times 10^{-3}$  hartree per Å, and  $5 \times 10^{-3}$  Å, respectively. In addition, the adsorption energy for iodine is estimated by the change of energy  $\Delta E$ :

$$\Delta E = E_{\text{coordination}} - E_{\text{I}_2} - E_{\text{AIOC}}$$

Where  $E_{\text{coordination}}$  is the optimized energy of the coordinated structures,  $E_{\text{I}_2}$  and  $E_{\text{AIOC}}$  are the optimized energies of the I<sub>2</sub> and AIOC parts, respectively.

Optimized geometries of the AIOCs interacting with iodine molecules.

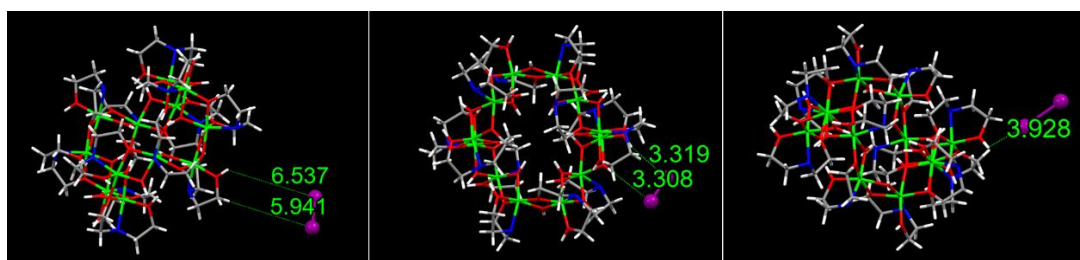

Fig. S45 AIOC-61 interacted with one iodine molecule.

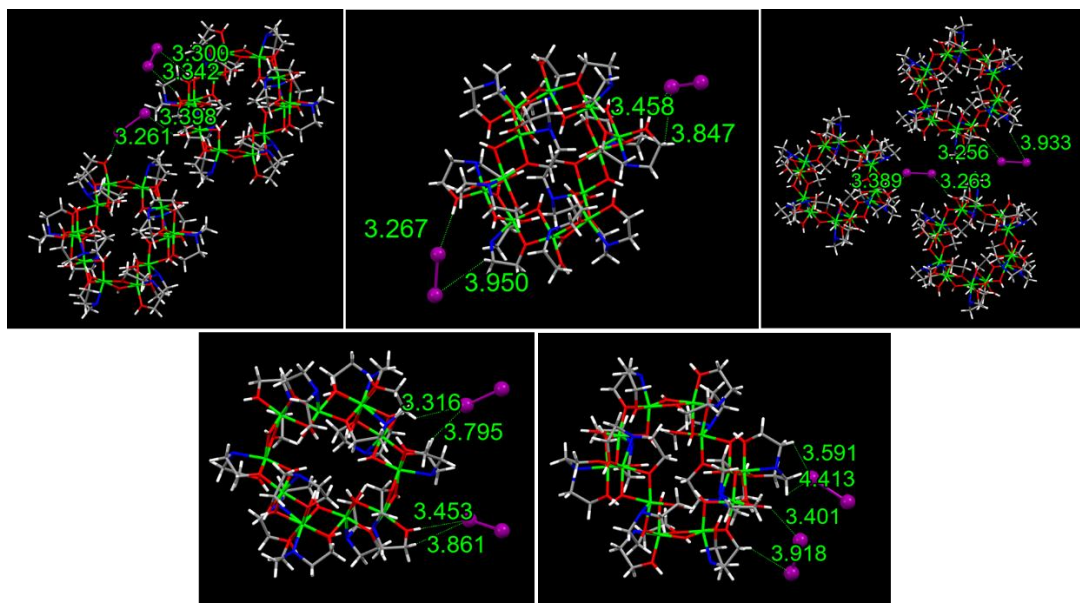

Fig. S46 AIOC-61 interacted with two iodine molecules.

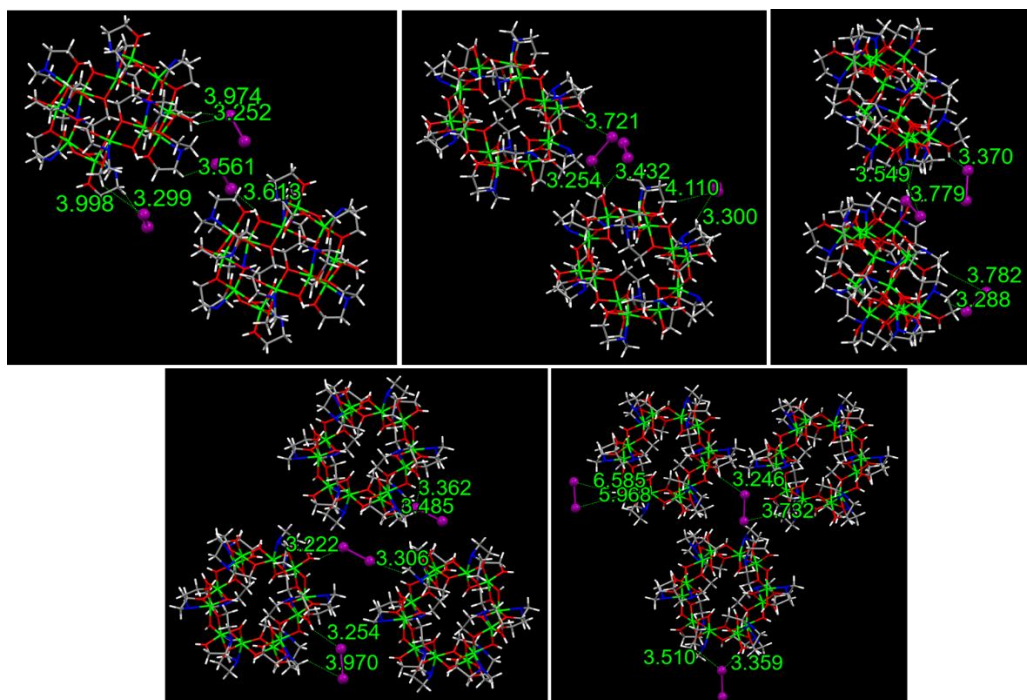

Fig. S47 AIOC-61 interacted with three iodine molecules.

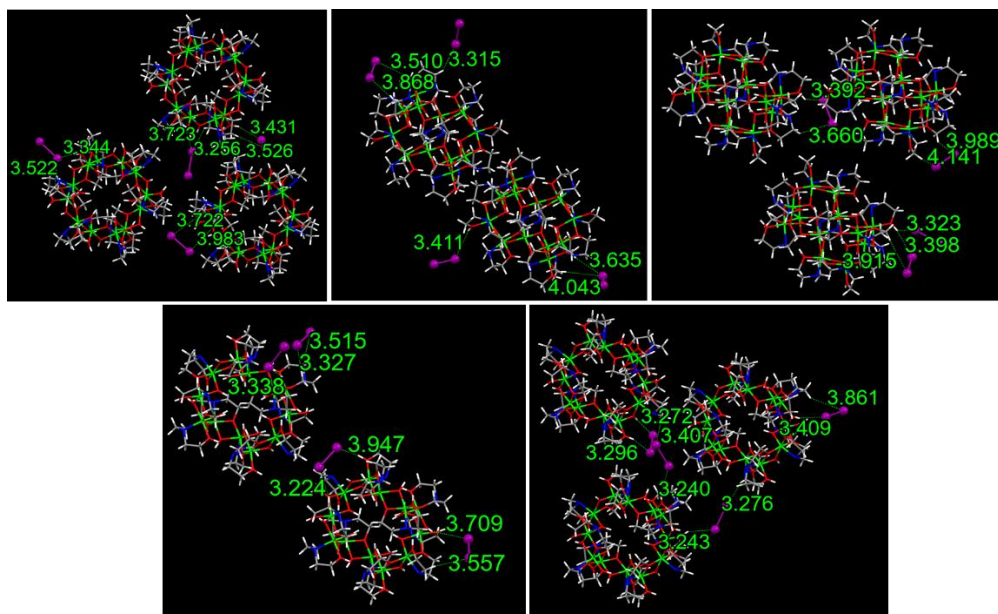

Fig. S48 AIOC-61 interacted with four iodine molecules.

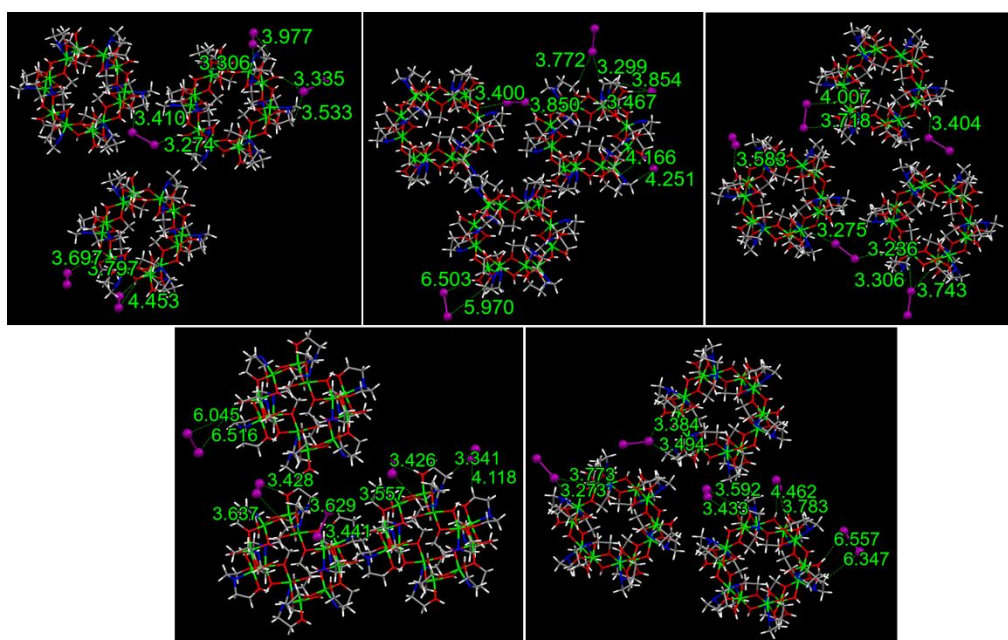

Fig. S49 AIOC-61 interacted with five iodine molecules.

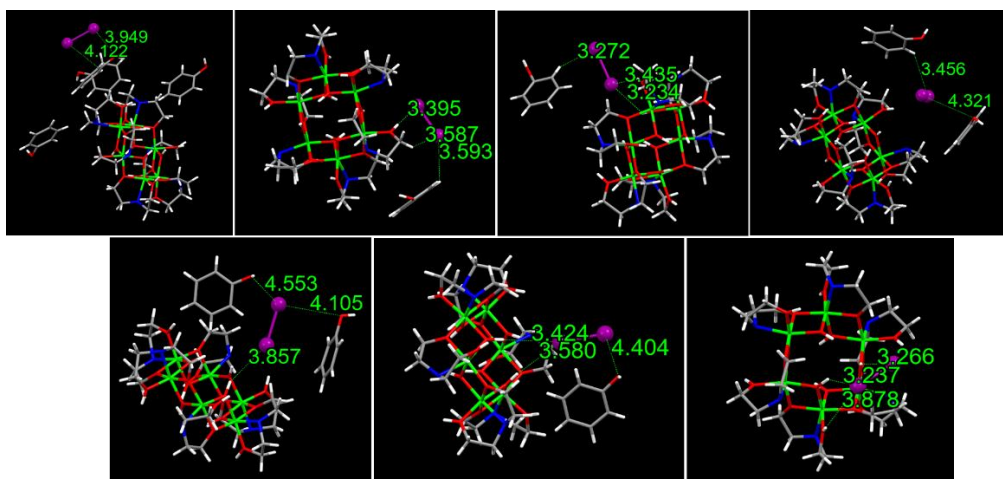

Fig. S50 AIOC-63 interacted with one iodine molecule.

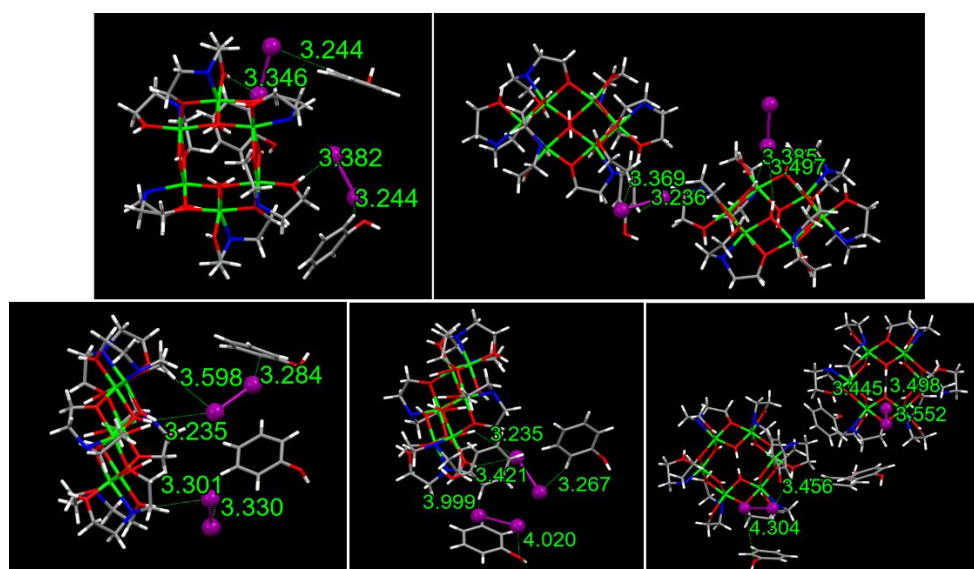

Fig. S51 AIOC-63 interacted with two iodine molecules.

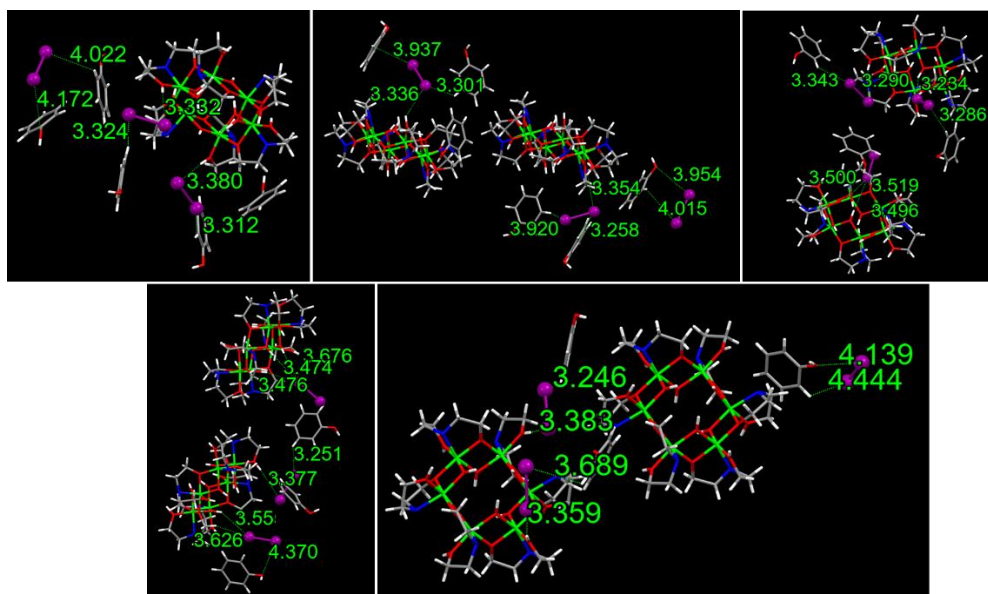

Fig. S52 AIOC-63 interacted with three iodine molecules.

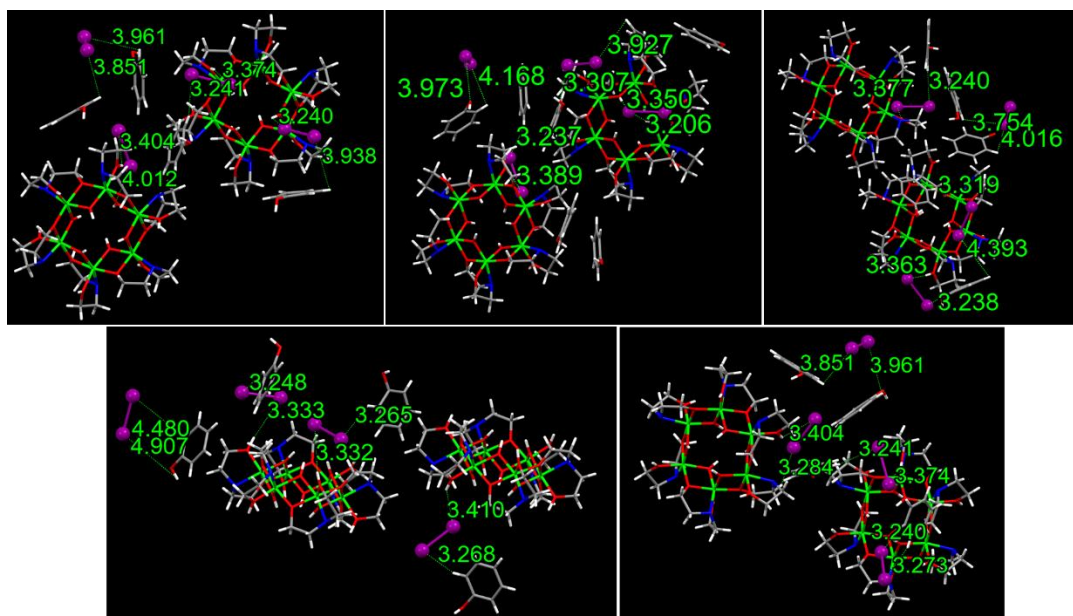

Fig. S53 AIOC-63 interacted with four iodine molecules.

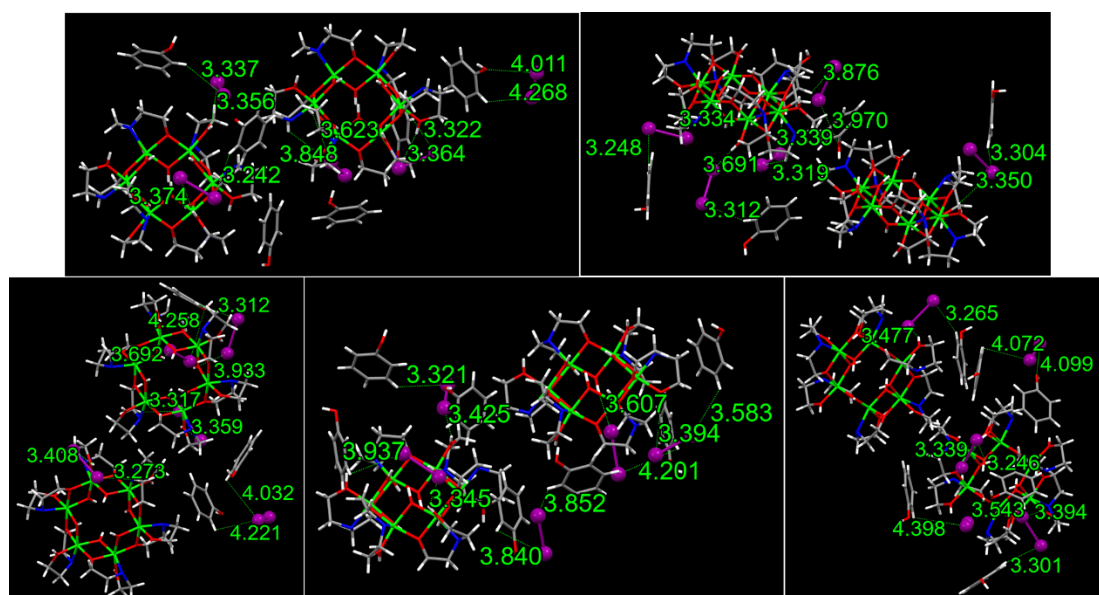

Fig. S54 AIOC-63 interacted with five iodine molecules.

## Reference

- [1] V. Safarifard, A. Morsali, *CrystEngComm* **2014**, *16*, 8660-8663.
- [2] J. Liu, R. Xiao, Y. L. Wong, X. P. Zhou, M. Zeller, A. D. Hunter, Q. Fang, L. Liao, Z. Xu, *Inorg. Chem.* **2018**, *57*, 4807-4811.
- [3] S. Yao, X. Sun, B. Liu, R. Krishna, G. Li, Q. Huo, Y. Liu, *J. Mater. Chem. A* **2016**, *4*, 15081-15087.
- [4] C. Falaise, C. Volkringer, J. Facqueur, T. Bousquet, L. Gasnot, T. Loiseau, *Chem. Commun.* **2013**, *49*, 10320-10322.
- [5] J. Wang, J. Luo, X. Luo, J. Zhao, D.-S. Li, G. Li, Q. Huo, Y. Liu, *Cryst. Growth Des.* **2015**, *15*, 915-920.
- [6] M. Liu, W. Liao, C. Hu, S. Du, H. Zhang, *Angew. Chem. Int. Ed.* **2012**, *51*, 1585-1588; *Angew. Chem.* **2012**, *124*, 1617-1620.
- [7] P. Cui, L. Ren, Z. Chen, H. Hu, B. Zhao, W. Shi, P. Cheng, *Inorg. Chem.* **2012**, *51*, 2303-2310.
- [8] C.-H. Liu, W.-H. Fang, Y. Sun, S. Yao, S.-T. Wang, D. Lu, J. Zhang, *Angew. Chem. Int. Ed.* **2021**, *60*, 21426-21433; *Angew. Chem.* **2021**, *133*, 21596-21603.
- [9] A. K. Chaudhari, S. Mukherjee, S. S. Nagarkar, B. Joarder, S. K. Ghosh, *CrystEngComm* **2013**, *15*, 9465.
- [10] K. K. Yee, Y. L. Wong, Z. Xu, *Dalton Trans.* **2016**, *45*, 5334-5338.
- [11] M. H. Zeng, Q. X. Wang, Y. X. Tan, S. Hu, H. X. Zhao, L. S. Long, M. Kurmoo, *J. Am. Chem. Soc.* **2010**, *132*, 2561-2563.
- [12] W. W. He, S. L. Li, G. S. Yang, Y. Q. Lan, Z. M. Su, Q. Fu, *Chem. Commun.* **2012**, *48*, 10001-10003.
- [13] Z. Wang, Y. Huang, J. Yang, Y. Li, Q. Zhuang, J. Gu, *Dalton Trans.* **2017**, *46*, 7412-7420.
- [14] L. Hashemi, A. Morsali, *CrystEngComm* **2012**, *14*, 779-781.
- [15] B. Delley, *J. Chem. Phys.* **2000**, *113*, 7756-7764.
- [16] B. Delley, *J. Chem. Phys.* **1990**, *92*, 508-517.
- [17] J. P. Perdew, K. Burke, M. Ernzerhof, *Phys. Rev. Lett.* **1996**, *77*, 3865-3868.
- [18] L. Versluis, T. Ziegler, *J. Chem. Phys.* **1988**, *88*, 322-328.
- [19] U. von Barth, L. Hedin, *J. Phys. C: Sol. St. Phys.* **1972**, *5*, 1629-1642.
- [20] N. Matsuzawa, J. e. Seto, D. A. Dixon, *J. Phys. Chem. A* **1997**, *101*, 9391-9398.
